# Supplementary material for: Thermally modulated multilayered graphene oxide for hydrogen storage
Source: Royal Society of Chemistry journal article supplement (doi:10.1039/c2cp23683d), 2011-11-30
Supplement: c2cp23683d.pdf [file c2cp23683d.pdf]

**Supplementary Information**

**Thermally-Modulated Multilayered  
Graphene Oxide for Hydrogen Storage**

*Byung Hoon Kim<sup>ab</sup>, Won G. Hong<sup>a</sup>, Han Young Yif<sup>c</sup>, Young-Kyu Han<sup>a</sup>, Sang Moon Lee<sup>a</sup>,*

*Sung Jin Chang<sup>a</sup>, Hoi Ri Moon<sup>b</sup>, Yongseok Jun<sup>b</sup>, and Hae Jin Kim<sup>\*a</sup>*

<sup>a</sup>Division of Materials Science, Korea Basic Science Institute,  
Daejeon, 305-333, Republic of Korea

<sup>b</sup>Interdisciplinary School of Green Energy, KIER-UNIST Advanced Center for  
Energy, UNIST, Ulsan, 689-798, Republic of Korea

<sup>c</sup>Next Generation Energy Technology Team, Electronic and Telecommunications Research  
Institute, Daejeon, 305-700, Republic of Korea

## Sample characterization

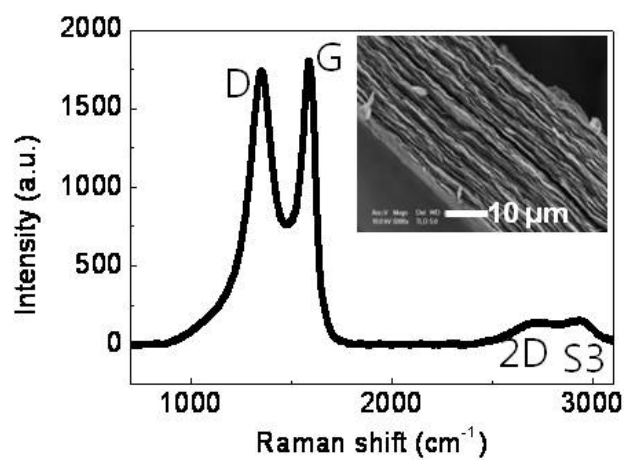

**Figure S1.** Raman spectroscopy of GO. The inset shows high-resolution SEM side-view images of multilayered GO.

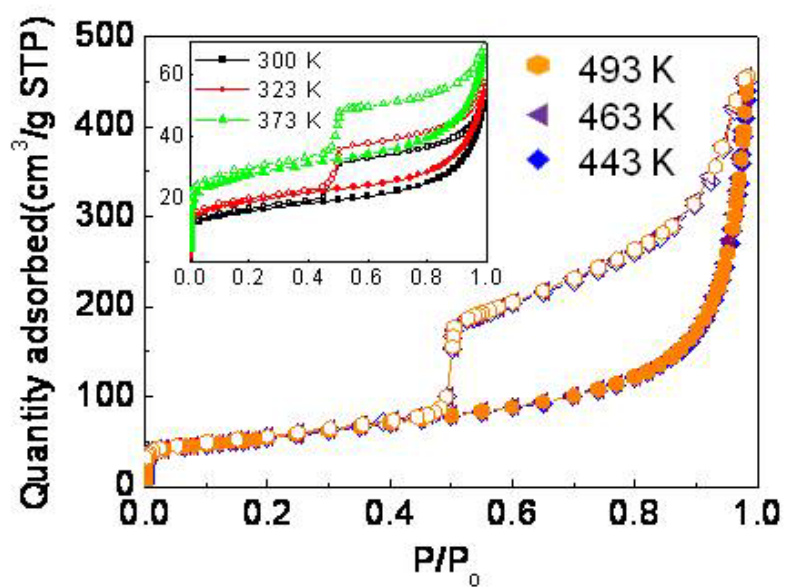

**Figure S2.** Nitrogen adsorption (solid symbols) and desorption (open symbols) isotherms of thermally modulated GO at 77 K.

## NMR study

The representative  $^{13}\text{C}$ -MAS (black) and  $^1\text{H}$ - $^{13}\text{C}$  CP MAS (red) NMR spectra for pristine GO are depicted in Fig. S3, which are similar to that of GO in the previous literature<sup>S1</sup>. From the well resolved  $^{13}\text{C}$  MAS NMR peaks, one could assign to the carbon site, graphitic  $sp^2$  carbon at 137 ppm, three characteristic functional groups for GO at 171 (O=C-O), 71 (C-OH), and 63 (C-O-C) ppm.  $^{13}\text{C}$  CPMAS NMR spectrum of pristine GO exhibits four well-resolved NMR peaks at 133 (graphitic  $sp^2$ ), 103 (O-C-O), 71 (C-OH), and 62 (C-O-C) ppm. The cross polarization effect increases the relative intensity of the hydroxyl group (71 ppm), largely due to the magnetization transfer from proton to the carbon center. Thus, it appears that the hydroxyl group in pristine GO contains an electron acceptor functionality.

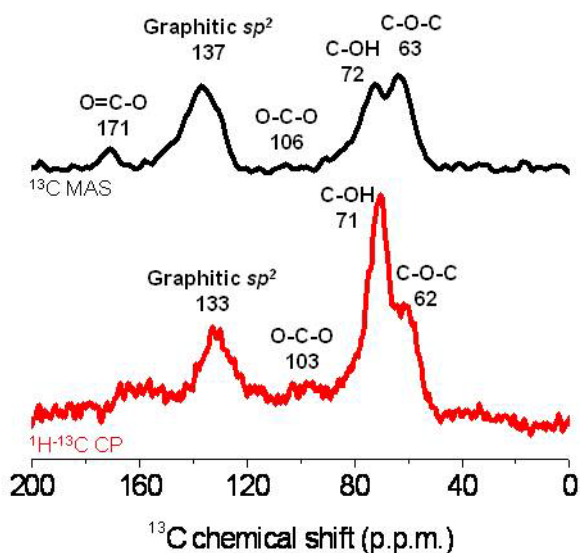

**Figure S3.**  $^{13}\text{C}$ -MAS (black) and  $^1\text{H}$ - $^{13}\text{C}$  CP (red) NMR spectra of pristine multilayered GO.

### Micro Raman mapping

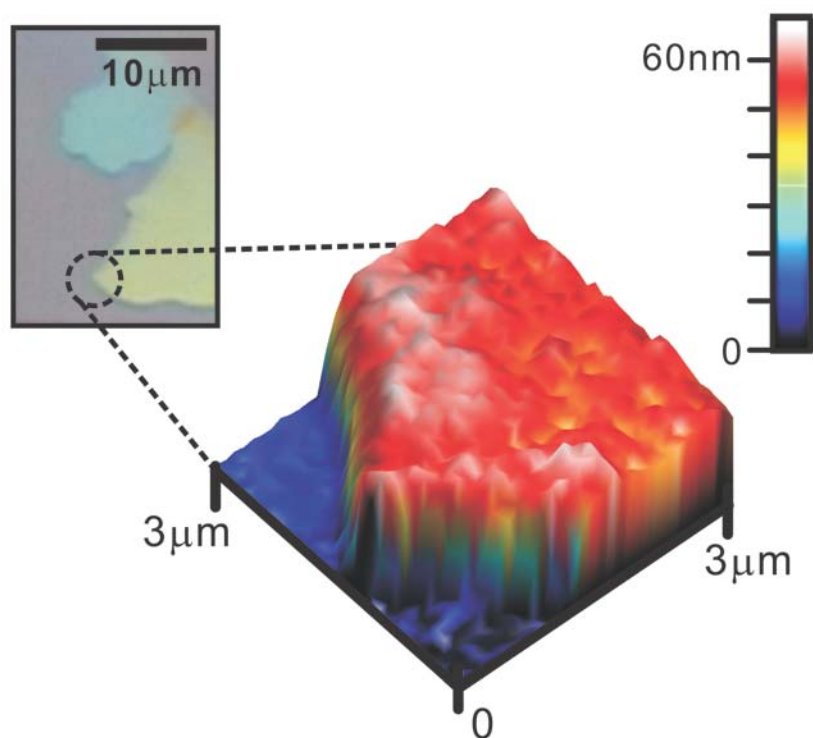

**Figure S4.** Topography for a part of the multilayered GO with atomic force microscopy (AFM) shows the average height of GO of 60 nm. The image on the left is the optical image of a large GO.

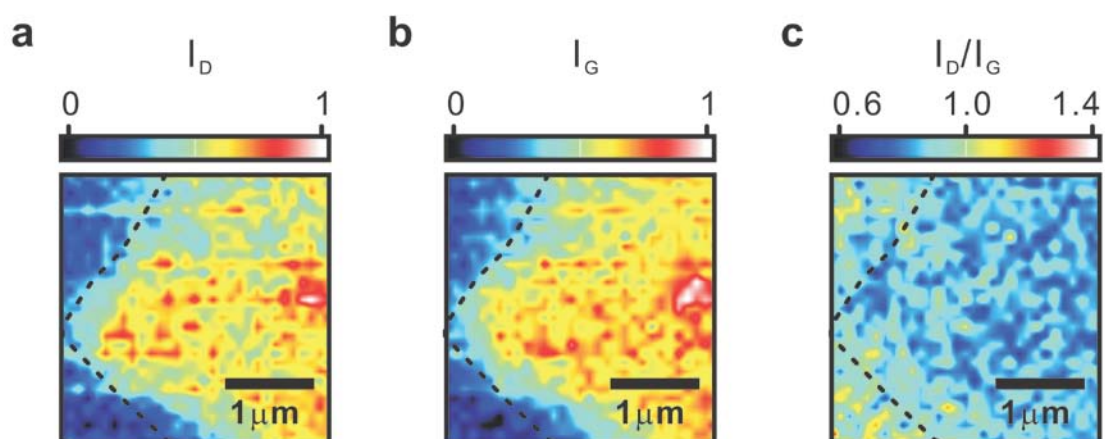

**Figure S5. Raman mapping of GO in air.** a, b, and c are  $I_D$ ,  $I_G$ , and ratio of  $I_D/I_G$ , respectively. Spatially resolved Raman spectroscopy for GO in air revealed D and G band signals are mostly distributed in the center of GO.

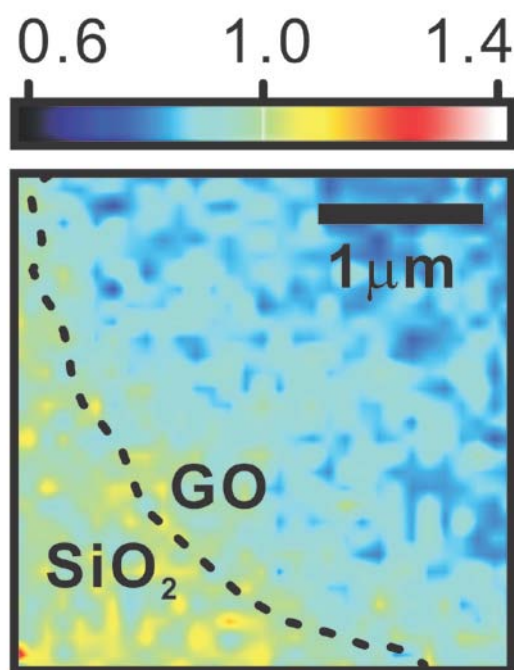

**Figure S6.**  $I_D/I_G$  ratio after the  $H_2$  adsorbed GO was left in air for 3 days. It is similar to that of GO in air, indicating the main adsorption occurs by physisorption.

**Table S1. BET surface area and pore volume of GOs.**  $T_a$ -dependent surface area  $S$  ( $\text{m}^2/\text{g}$ ) and pore volume  $V$  ( $\text{cm}^3/\text{g}$ ).

| $T_a$ (K) | $S$ ( $\text{m}^2/\text{g}$ ) | $V$ ( $\text{cm}^3/\text{g}$ ) |
|-----------|-------------------------------|--------------------------------|
| 300       | 57.5                          | 0.076                          |
| 323       | 69.3                          | 0.084                          |
| 373       | 100.8                         | 0.106                          |
| 443       | 183.1                         | 0.633                          |
| 463       | 186.1                         | 0.675                          |
| 493       | 192.1                         | 0.689                          |

**Table S2. Variation of interlayer distance and H<sub>2</sub> storage capacity.**  $T_a$ -dependent interlayer distance  $x$  (Å) and H<sub>2</sub> uptake (wt%) values at 9.0 MPa.

| $T_a$ (K) | 77 K    |                       | 298 K   |                             |
|-----------|---------|-----------------------|---------|-----------------------------|
|           | $x$ (Å) | H <sub>2</sub> uptake | $x$ (Å) | H <sub>2</sub> uptake (wt%) |
| 300       | 6.705   | 1.132                 | 7.605   | 0.2802                      |
| 323       | 6.644   | 1.604                 | 6.685   | 0.2850                      |
| 373       | 6.524   | 2.684                 | 6.587   | 0.3563                      |
| 443       | 6.467   | 4.150                 | 6.531   | 0.4914                      |
| 463       | 6.386   | 4.805                 | 6.414   | 0.4833                      |
| 493       | 6.845   | 4.352                 | 6.705   | 0.4622                      |

### Data fitting procedure

We fitted the experimental data to a log normal distribution function to obtain the optimal interlayer distance ( $x_m$ ) and maximum H<sub>2</sub> uptake values from our observed data. The distribution function between the number of adsorbed hydrogen molecules ( $N$  in g<sup>-1</sup>) and interlayer distance of GO ( $x$  in Å) is

$$N = N_0 + \frac{N_s}{\sqrt{2\pi\sigma x}} \exp\left[-\frac{\{\ln(x/x_m)\}^2}{2\sigma^2}\right],$$

where  $N_0$  is the number of adsorbed H<sub>2</sub> on a single layer of GO,  $N_s$  is the number of H<sub>2</sub> per unit area and unit mass of GO (Å<sup>-2</sup>g<sup>-1</sup>), and  $1/\sigma$  (Å<sup>3</sup>) is the volume occupied by the same number of H<sub>2</sub> at each pressure.

**Table S3.** The number of adsorbed H<sub>2</sub> on a single-layer GO ( $N_0$ ), the volume occupied by the same number of H<sub>2</sub> ( $\sigma$ ), and the number of H<sub>2</sub> per unit area and unit mass of GO ( $N_s$ ) at 298 K.

| $P$ (MPa) | $N_0$ (10 <sup>20</sup> g <sup>-1</sup> ) | $\sigma$ (Å <sup>-3</sup> ) | $N_s$ (10 <sup>20</sup> Å <sup>-2</sup> g <sup>-1</sup> ) |
|-----------|-------------------------------------------|-----------------------------|-----------------------------------------------------------|
| 6.00      | 4.405 ± 0.0265                            | 0.0154 ± 0.0003             | 0.642 ± 0.0088                                            |
| 7.50      | 7.001 ± 0.7990                            | 0.0182 ± 0.0045             | 1.657 ± 0.2896                                            |
| 9.00      | 8.344 ± 0.8403                            | 0.0188 ± 0.0039             | 2.203 ± 0.3131                                            |

### References

S1. Gao, W.; Alemany, L. B.; Ci, L.; Ajayan, P. M. New insight into the structure and reduction of graphite oxide. *Nature Chem.*, 2009, **1**, 403-408.
